# Supplementary material for: Identification of de novo mutations in the Chinese ASD cohort via whole-exome sequencing unveils brain regions implicated in autism
Source: Research Square preprint supplement (doi:10.21203/rs.3.rs-729083/v1), 2021-07-26
Supplement: Supplementary file 2 [file 1472cbfef6b54c43ec98e800.docx]

Table S5. Demographic information of ABIDE-I participants.

|  |  | VBM | resting-state fMRI |
| --- | --- | --- | --- |
| ASD | N | 330 | 265 |
| Sex (M) | 286 | 232 |
| Age (Mean±SD) | 17.77±8.7 | 17.81±8.1 |
| Medication | 43 | 58 |
| FIQ | 105.95 | 107.74 |
| Healthy Control | N | 437 | 379 |
| Sex (M) | 351 | 300 |
| Age | 17.15±7.2 | 17.46±7.67 |
| Medication (Other illness) | 2 | 1 |
| FIQ | 110.96 | 111.41 |
